# Supplementary material for: Aescin-Cholesterol Complexes in DMPC Model Membranes: A DSC and Temperature-Dependent Scattering Study
Source: PubMed Central journal article supplement (PMC6447539; doi:10.1038/s41598-019-41865-z), 2019-04-03
Supplement: 41598_2019_41865_MOESM1_ESM.pdf [file 41598_2019_41865_MOESM1_ESM.pdf]

## Electronic Supplementary Information

# Aescin-Cholesterol Complexes in DMPC Model Membranes: A DSC and Temperature-Dependent Scattering Study

Ramsia Sreij,<sup>a</sup> Carina Dargel,<sup>a</sup> Ralf Schweins,<sup>b</sup> Sylvain Prévost,<sup>b,c</sup> Rajeev Dattani,<sup>c</sup> and Thomas Hellweg,<sup>\*a</sup>

\*Email : thomas.hellweg@uni-bielefeld.de  
\*Phone : +49(0)521 1062055 Fax : +49(0)521 1062981

<sup>a</sup>Physical and Biophysical Chemistry, Bielefeld University, Universitätsstr. 25, 33615 Bielefeld, Germany.

<sup>b</sup>Institut Laue-Langevin, DS/LSS, 71 avenue des Martyrs, 38042 GRENOBLE Cedex 9, France

<sup>c</sup>ESRF-The European Synchrotron, 71, Avenue des Martyrs, 38043 Grenoble Cedex 9, France.

### 1. Wide-angle X-ray scattering (WAXS)

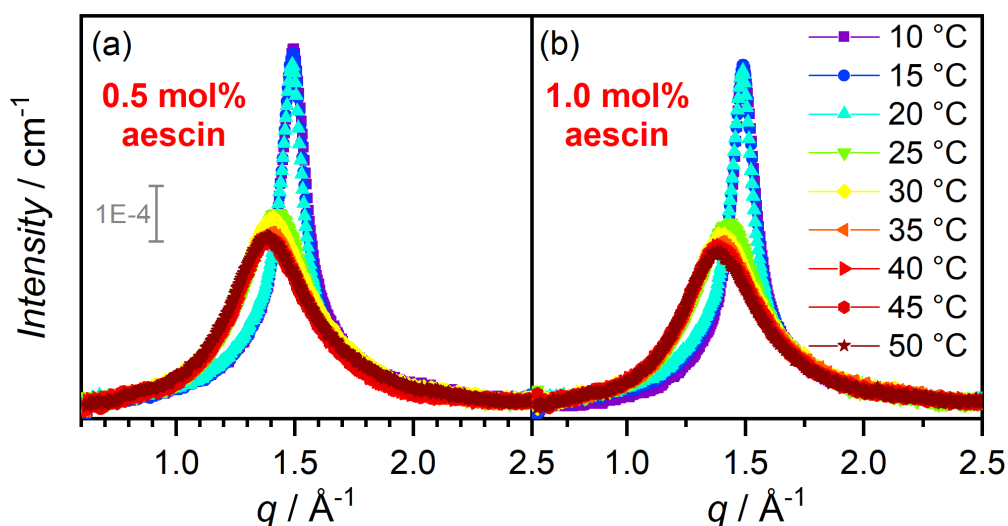

**Figure S1** WAXS curves. Wide-angle X-ray scattering (WAXS) spectra at temperatures around the main phase transition temperature  $T_m$  of DMPC and aescin containing (a) 0.5 mol% aescin and (b) 1.0 mol% aescin. The scale bar applies for all panels. Please see electronic version for color encoding.

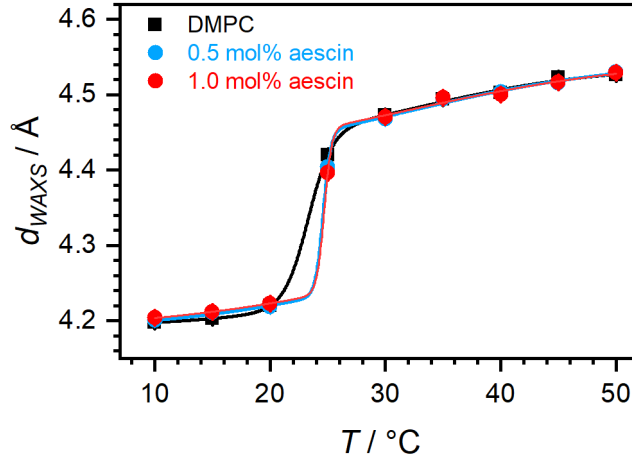

**Figure S2:** Acyl chain correlation distances  $d_{WAXS}$  calculated from peak maxima in Fig. S1 by Eqn. 1 in the main article. The figure shows samples without cholesterol. Solid lines are sigmoidal fits to the data.

## 2. Small-angle scattering (SAXS and SANS)

(a) Core multi shell (CMS) model (b) paracrystal lamellar stack (LS) model (c) Vesicle model

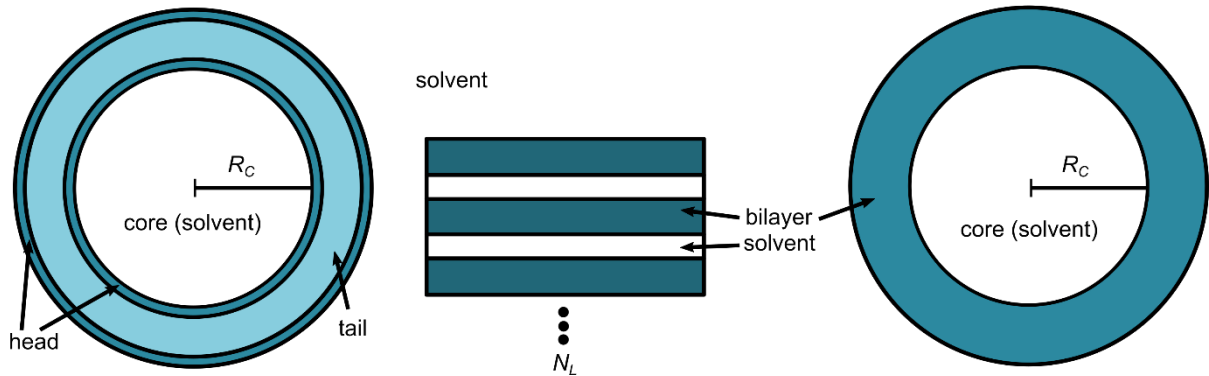

**Figure S3:** Schematics of models used for fitting. (a) *Core multi shell* (CMS) model. (b) *Vesicle* model (c) *Paracrystal lamellar stack* (LS) model. All models are implemented in SASView[1]. The CMS model was used for SAXS and the LS and Vesicle models for SANS analysis.

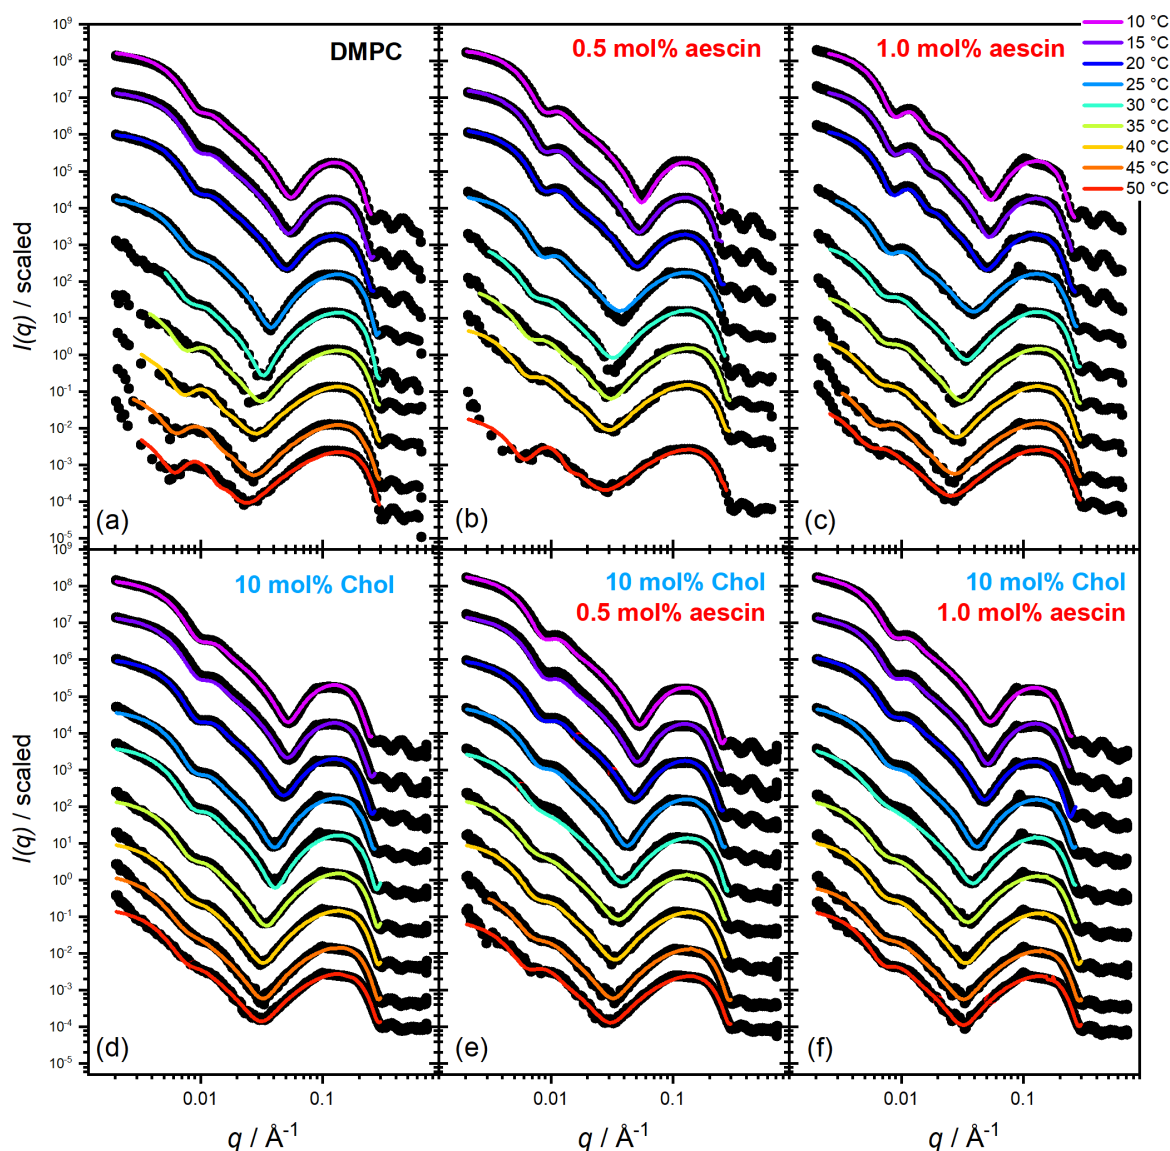

**Figure S4:** SAXS curves (a)-(c) without and (d)-(f) with 10 mol% cholesterol at temperatures between 10 °C and 50 °C, measured at ID02 beamline. Samples in panels (a) and (d) are without aescin while (b) and (e) contain 0.5 mol% aescin and (c) and (f) 1 mol% aescin. Solid lines correspond to the *core multi shell* (CMS) model implemented in SASView.[1] XSLDs used for fitting are summarised in Table S1. The scattering curves at 50 °C are on absolute scale ( $\text{cm}^{-1}$ ). All other ones are scaled with respect to it (by factors of 10).

**Table S1** Parameters used to calculate the XSLD for DMPC, aescin and cholesterol. The parameters are molecular formula, density ( $\rho$ ), molar volume ( $V_M$ ) and molar mass ( $M$ ), the molecular volume ( $V$ ) and the X-ray scattering length density (XSLD). Values for aescin were calculated with ChemSketch[2].  $\rho$  (DMPC) are temperature-dependent. All other values are independent on temperature. Values for DMPC are based on experiments by Nagle et al.[3]. Bold values were directly taken from this study.

| component     | <b>Molecular formula</b>                          | $\rho$<br>g/cm <sup>3</sup> | $V_M$<br>cm <sup>3</sup> / mol | $M$<br>g/mol | $V$<br>Å <sup>3</sup> | <b>XSLD</b><br>10 <sup>-6</sup> Å <sup>2</sup> |
|---------------|---------------------------------------------------|-----------------------------|--------------------------------|--------------|-----------------------|------------------------------------------------|
| Cholesterol   | C <sub>27</sub> H <sub>46</sub> O                 | 0.98                        | 391.4                          | 386.7        | 630[5]                | 9.32                                           |
| Aescin        | C <sub>55</sub> H <sub>86</sub> O <sub>24</sub>   | 1.46                        | 771.1                          | 1131.3       | 1280                  | 13.4                                           |
| Aescin (head) | C <sub>18</sub> H <sub>30</sub> O <sub>17</sub>   | 1.88                        | 275.4                          | 518.4        | 457                   | 16.9                                           |
| Aescin (tail) | C <sub>37</sub> H <sub>58</sub> O <sub>7</sub>    | 1.16                        | 527.6                          | 614.8        | 876                   | 10.8                                           |
| DMPC          | C <sub>36</sub> H <sub>72</sub> NO <sub>8</sub> P | <b>1.08</b>                 | 626.4                          | 677.9        | <b>1040</b>           | 10.2                                           |
| DMPC(head)    | C <sub>10</sub> H <sub>18</sub> NO <sub>8</sub> P | 1.50                        | 207.2                          | 311.2        | <b>344</b>            | 13.5                                           |
| DMPC(tail)    | C <sub>26</sub> H <sub>54</sub>                   | -                           | 419.3                          | 366.8        | 696                   | -                                              |

**Table S2:** Calculated XSLDs for light water (H<sub>2</sub>O) in dependence of temperature.

| $T/^\circ\text{C}$             | 10   | 15   | 20   | 25   | 30   | 35   | 40   | 45   | 50   |
|--------------------------------|------|------|------|------|------|------|------|------|------|
| XSLD / $10^{-6} \text{ \AA}^2$ | 9.47 | 9.46 | 9.46 | 9.44 | 9.43 | 9.42 | 9.40 | 9.38 | 9.36 |

### Small-angle X-ray scattering – Fit parameters – Core-multi-shell fit (CMS)

**Table S3:** XSLDs used for fitting of the SAXS data with the CMS Model from SASView (V 4.1.2.)[1] The fit parameters XSLD(head) and  $d_h=7 \text{ \AA}$  were fixed for both shells prior to fitting. The parameters XSLD(solvent) and XSLD(core) were fitted starting from calculated values for light water (H<sub>2</sub>O). XSLD(tail) was the final parameter to adjust due to the most uncertain XSLD value because of volumetric changes and temperature sensitivity. The structural parameters obtained from the fit ( $R_{C,X}$  and  $d_M=d_h + d_{tail} + d_h$ ) are plotted in Fig. 7 in the main manuscript.

| x(aescin) | X(Chol) | $T$              | XSLD (head)                | XSLD(tail) calc            | XSLD(tail) fit             | XSLD (solvent)             | XSLD (core)                | PDI       |  |
|-----------|---------|------------------|----------------------------|----------------------------|----------------------------|----------------------------|----------------------------|-----------|--|
| mol%      | mol%    | $^\circ\text{C}$ | $10^{-6} \text{ \AA}^{-2}$ | $10^{-6} \text{ \AA}^{-2}$ | $10^{-6} \text{ \AA}^{-2}$ | $10^{-6} \text{ \AA}^{-2}$ | $10^{-6} \text{ \AA}^{-2}$ | $R_{C,X}$ |  |
| 0         | 0       | 10               | 13.500                     | 8.520                      | 8.324                      | 9.472                      | 9.522                      | 0.25      |  |
| 0         | 0       | 15               | 13.500                     | 8.400                      | 8.281                      | 9.470                      | 9.513                      | 0.25      |  |
| 0         | 0       | 20               | 13.500                     | 8.320                      | 8.125                      | 9.453                      | 9.498                      | 0.26      |  |
| 0         | 0       | 25               | 13.500                     | 7.910                      | 7.588                      | 9.443                      | 9.450                      | 0.28      |  |
| 0         | 0       | 30               | 13.500                     | 7.840                      | 7.395                      | 9.431                      | 9.433                      | 0.28      |  |
| 0         | 0       | 35               | 13.500                     | 7.790                      | 7.294                      | 9.417                      | 9.407                      | 0.24      |  |
| 0         | 0       | 40               | 13.500                     | 7.730                      | 7.118                      | 9.375                      | 9.365                      | 0.26      |  |
| 0         | 0       | 45               | 13.500                     | 7.700                      | 7.119                      | 9.352                      | 9.337                      | 0.25      |  |
| 0         | 0       | 50               | 13.500                     | 7.560                      | 7.037                      | 9.341                      | 9.333                      | 0.20      |  |
| x(aescin) | X(Chol) | $T$              | XSLD (head)                | XSLD(tail) calc            | XSLD(tail) fit             | XSLD (solvent)             | XSLD (core)                | PDI       |  |
| mol%      | mol%    | $^\circ\text{C}$ | $10^{-6} \text{ \AA}^{-2}$ | $10^{-6} \text{ \AA}^{-2}$ | $10^{-6} \text{ \AA}^{-2}$ | $10^{-6} \text{ \AA}^{-2}$ | $10^{-6} \text{ \AA}^{-2}$ | $R_{C,X}$ |  |
| 0.5       | 0       | 10               | 13.517                     | 8.531                      | 8.375                      | 9.470                      | 9.506                      | 0.22      |  |
| 0.5       | 0       | 15               | 13.517                     | 8.412                      | 8.186                      | 9.445                      | 9.482                      | 0.21      |  |
| 0.5       | 0       | 20               | 13.517                     | 8.332                      | 8.137                      | 9.448                      | 9.476                      | 0.22      |  |
| 0.5       | 0       | 25               | 13.517                     | 7.924                      | 7.747                      | 9.474                      | 9.476                      | 0.23      |  |
| 0.5       | 0       | 30               | 13.517                     | 7.855                      | 7.594                      | 9.419                      | 9.423                      | 0.27      |  |
| 0.5       | 0       | 35               | 13.517                     | 7.805                      | 7.282                      | 9.396                      | 9.391                      | 0.27      |  |
| 0.5       | 0       | 40               | 13.517                     | 7.745                      | 7.258                      | 9.398                      | 9.394                      | 0.27      |  |
| 0.5       | 0       | 45               | 13.517                     | not measured               |                            |                            |                            |           |  |
| 0.5       | 0       | 50               | 13.517                     | 7.576                      | 7.169                      | 9.370                      | 9.355                      | 0.16      |  |
| x(aescin) | X(Chol) | $T$              | XSLD (head)                | XSLD(tail) calc            | XSLD(tail) fit             | XSLD (solvent)             | XSLD (core)                | PDI       |  |
| mol%      | mol%    | $^\circ\text{C}$ | $10^{-6} \text{ \AA}^{-2}$ | $10^{-6} \text{ \AA}^{-2}$ | $10^{-6} \text{ \AA}^{-2}$ | $10^{-6} \text{ \AA}^{-2}$ | $10^{-6} \text{ \AA}^{-2}$ | $R_{C,X}$ |  |
| 1.0       | 0       | 10               | 13.534                     | 8.534                      | 8.221                      | 9.456                      | 9.494                      | 0.18      |  |
| 1.0       | 0       | 15               | 13.534                     | 8.424                      | 8.227                      | 9.452                      | 9.485                      | 0.19      |  |
| 1.0       | 0       | 20               | 13.534                     | 8.345                      | 8.145                      | 9.453                      | 9.487                      | 0.17      |  |
| 1.0       | 0       | 25               | 13.534                     | 7.939                      | 7.612                      | 9.442                      | 9.445                      | 0.22      |  |
| 1.0       | 0       | 30               | 13.534                     | 7.870                      | 7.396                      | 9.429                      | 9.428                      | 0.30      |  |
| 1.0       | 0       | 35               | 13.534                     | 7.820                      | 7.296                      | 9.414                      | 9.408                      | 0.25      |  |
| 1.0       | 0       | 40               | 13.534                     | 7.761                      | 7.189                      | 9.395                      | 9.390                      | 0.28      |  |
| 1.0       | 0       | 45               | 13.534                     | 7.731                      | 7.123                      | 9.369                      | 9.362                      | 0.24      |  |
| 1.0       | 0       | 50               | 13.534                     | 7.592                      | 7.007                      | 9.347                      | 9.339                      | 0.26      |  |

**Table S3 (continuation):** XSLDs used for fitting of the SAXS data with the CMS Model from SASView (V 4.1.2.) [1] The fit parameters XSLD(head) and  $d_h=7 \text{ \AA}$  were fixed for both shells prior to fitting. The parameters XSLD(solvent) and XSLD(core) were fitted starting from calculated values for light water ( $\text{H}_2\text{O}$ ). XSLD(tail) was the final parameter to adjust due to the most uncertain XSLD value because of volumetric changes and temperature sensitivity. The structural parameters obtained from the fit ( $R_{C,X}$  and  $d_M=d_h + d_{tail} + d_h$ ) are plotted in Fig. 7 in the main manuscript.

| x(aesc)   | X(Chol) | T  | XSLD (head)                | XSLD(tail) calc            | XSLD(tail) fit             | XSLD (solvent)             | XSLD (core)                | PDI       |
|-----------|---------|----|----------------------------|----------------------------|----------------------------|----------------------------|----------------------------|-----------|
| mol%      | mol%    | °C | $10^{-6} \text{ \AA}^{-2}$ | $10^{-6} \text{ \AA}^{-2}$ | $10^{-6} \text{ \AA}^{-2}$ | $10^{-6} \text{ \AA}^{-2}$ | $10^{-6} \text{ \AA}^{-2}$ | $R_{C,X}$ |
| 0         | 10      | 10 | 13.500                     | 8.600                      | 8.295                      | 9.475                      | 9.506                      | 0.25      |
| 0         | 10      | 15 | 13.500                     | 8.492                      | 8.219                      | 9.466                      | 9.505                      | 0.25      |
| 0         | 10      | 20 | 13.500                     | 8.420                      | 8.092                      | 9.463                      | 9.494                      | 0.26      |
| 0         | 10      | 25 | 13.500                     | 8.051                      | 7.818                      | 9.466                      | 9.486                      | 0.25      |
| 0         | 10      | 30 | 13.500                     | 7.988                      | 7.660                      | 9.434                      | 9.451                      | 0.25      |
| 0         | 10      | 35 | 13.500                     | 7.943                      | 7.449                      | 9.424                      | 9.433                      | 0.28      |
| 0         | 10      | 40 | 13.500                     | 7.889                      | 7.373                      | 9.423                      | 9.428                      | 0.30      |
| 0         | 10      | 45 | 13.500                     | 7.862                      | 7.305                      | 9.382                      | 9.389                      | 0.35      |
| 0         | 10      | 50 | 13.500                     | 7.736                      | 7.235                      | 9.363                      | 9.366                      | 0.30      |
| x(aescin) | X(Chol) | T  | XSLD (head)                | XSLD(tail) calc            | XSLD(tail) fit             | XSLD (solvent)             | XSLD (core)                | PDI       |
| mol%      | mol%    | °C | $10^{-6} \text{ \AA}^{-2}$ | $10^{-6} \text{ \AA}^{-2}$ | $10^{-6} \text{ \AA}^{-2}$ | $10^{-6} \text{ \AA}^{-2}$ | $10^{-6} \text{ \AA}^{-2}$ | $R_{C,X}$ |
| 0.5       | 10      | 10 | 13.517                     | 8.611                      | 8.261                      | 9.457                      | 9.501                      | 0.22      |
| 0.5       | 10      | 15 | 13.517                     | 8.804                      | 8.265                      | 9.445                      | 9.484                      | 0.23      |
| 0.5       | 10      | 20 | 13.517                     | 8.432                      | 8.198                      | 9.463                      | 9.484                      | 0.23      |
| 0.5       | 10      | 25 | 13.517                     | 8.065                      | 7.827                      | 9.436                      | 9.452                      | 0.27      |
| 0.5       | 10      | 30 | 13.517                     | 8.003                      | 7.548                      | 9.437                      | 9.452                      | 0.33      |
| 0.5       | 10      | 35 | 13.517                     | 7.958                      | 7.521                      | 9.422                      | 9.427                      | 0.28      |
| 0.5       | 10      | 40 | 13.517                     | 7.904                      | 7.382                      | 9.400                      | 9.403                      | 0.27      |
| 0.5       | 10      | 45 | 13.517                     | 7.878                      | 7.226                      | 9.357                      | 9.353                      | 0.25      |
| 0.5       | 10      | 50 | 13.517                     | 7.752                      | 7.180                      | 9.359                      | 9.352                      | 0.30      |
| x(aescin) | X(Chol) | T  | XSLD (head)                | XSLD(tail) calc            | XSLD(tail) fit             | XSLD (solvent)             | XSLD (core)                | PDI       |
| mol%      | mol%    | °C | $10^{-6} \text{ \AA}^{-2}$ | $10^{-6} \text{ \AA}^{-2}$ | $10^{-6} \text{ \AA}^{-2}$ | $10^{-6} \text{ \AA}^{-2}$ | $10^{-6} \text{ \AA}^{-2}$ | $R_{C,X}$ |
| 1.0       | 10      | 10 | 13.534                     | 8.623                      | 8.364                      | 9.478                      | 9.516                      | 0.23      |
| 1.0       | 10      | 15 | 13.534                     | 8.516                      | 8.315                      | 9.479                      | 9.512                      | 0.23      |
| 1.0       | 10      | 20 | 13.534                     | 8.445                      | 8.250                      | 9.477                      | 9.504                      | 0.25      |
| 1.0       | 10      | 25 | 13.534                     | 8.080                      | 7.861                      | 9.440                      | 9.458                      | 0.27      |
| 1.0       | 10      | 30 | 13.534                     | 8.018                      | 7.692                      | 9.436                      | 9.450                      | 0.38      |
| 1.0       | 10      | 35 | 13.534                     | 7.973                      | 7.520                      | 9.422                      | 9.427                      | 0.30      |
| 1.0       | 10      | 40 | 13.534                     | 7.920                      | 7.382                      | 9.401                      | 9.406                      | 0.27      |
| 1.0       | 10      | 45 | 13.534                     | 7.893                      | 7.289                      | 9.378                      | 9.377                      | 0.29      |
| 1.0       | 10      | 50 | 13.534                     | 7.768                      | 7.264                      | 9.360                      | 9.361                      | 0.25      |

## References

- [1] SASView, Freeware Version 4.1.2, <http://www.sasview.org>, 2017.
- [2] ACD/ChemSketch, Freeware Version, Advanced Chemistry Development, Inc., Toronto, ON, Canada, [www.acdlabs.com](http://www.acdlabs.com), 2015.
- [3] Nagle, J. F. and Wilkinson, D. A., Lecithin bilayers. Density measurement and molecular interactions, *Biophys. J.*, **23**(2), 159-175 (1978).
- [4] Porod, G. Die Röntgenkleinwinkelstreuung von dichtgepackten kolloidalen Systemen – I. Teil- *Kolloid Zeitschrift*, **124**, 83-114 (1951).
- [5] Greenwood, A. I., Tristram-Nagle, S. & Nagle, J. F. Partial molecular volumes of lipids and cholesterol, *Chemistry and physics of lipids*, **114**(1-2), 1-10 (2006)
